# Supplementary material
Source: ML conference proceedings conference paper supplement (https://openreview.net/forum?id=883lVZEH6m)

Hessian value of the columns

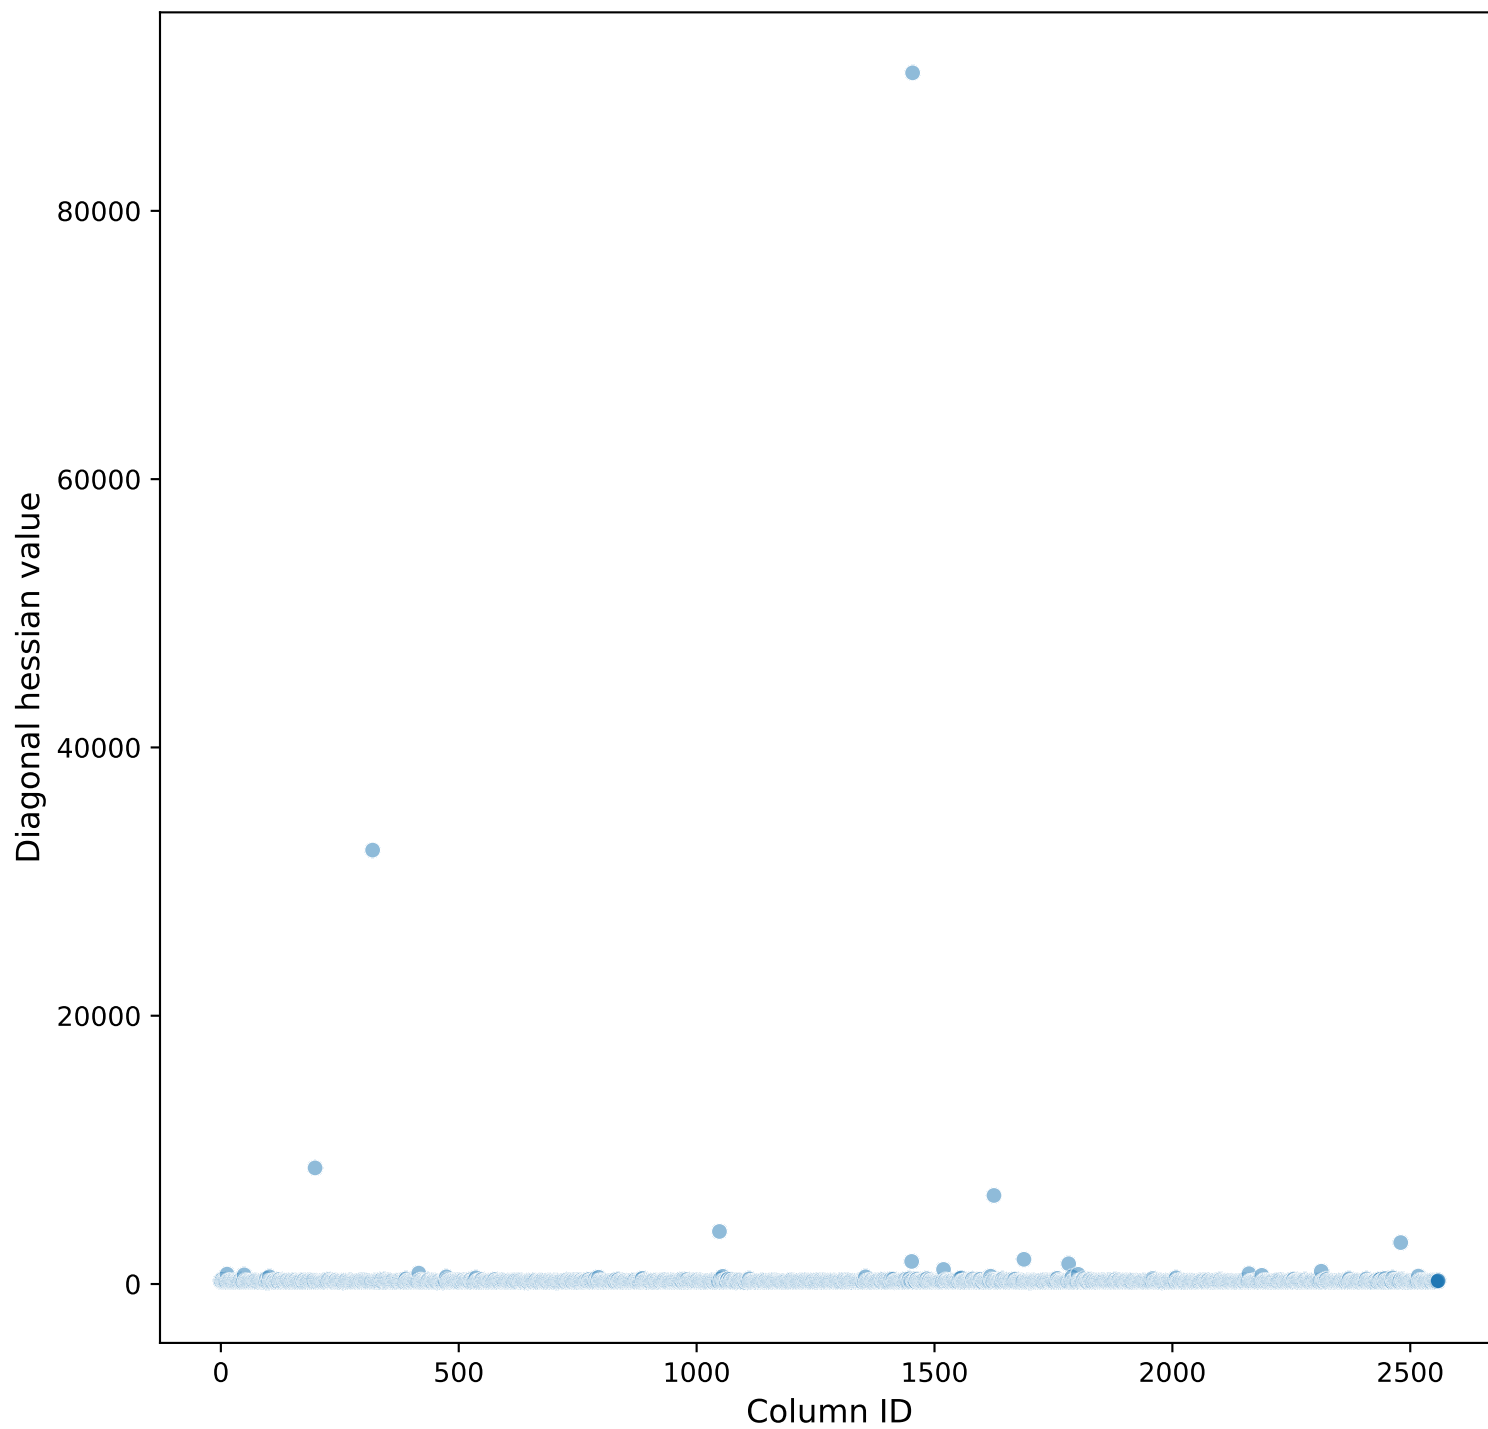

Supplement: supplementary_material [file hess.pdf › MXSens/experiments/weights-extraction/hess.pdf]

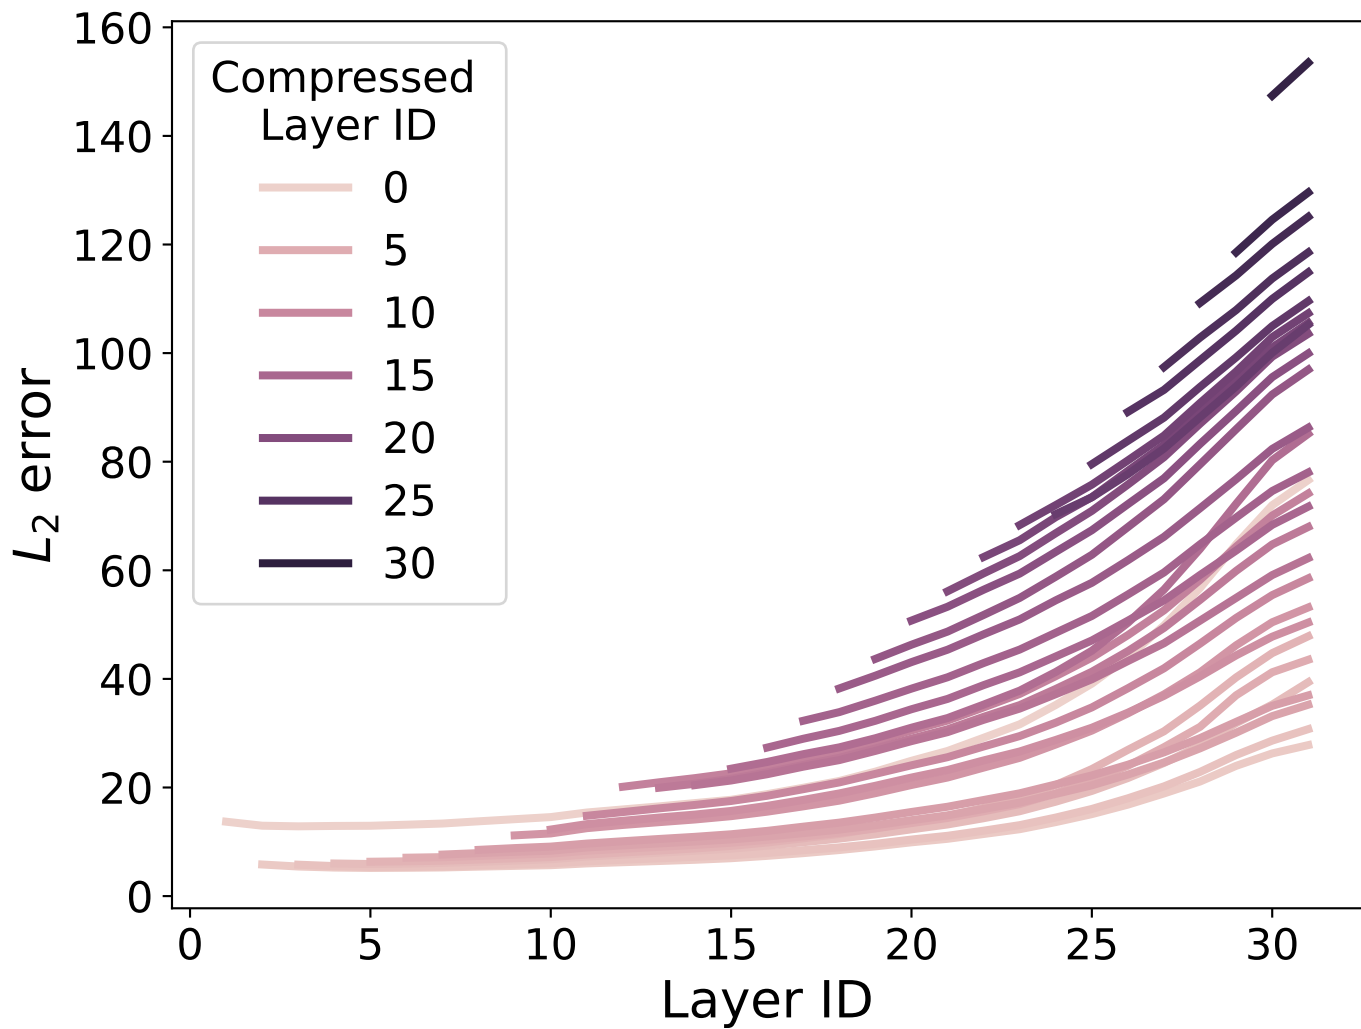

Supplement: supplementary_material [file propagation-oa.pdf › MXSens/experiments/weights-extraction/propagation-oa.pdf]

Error propagation

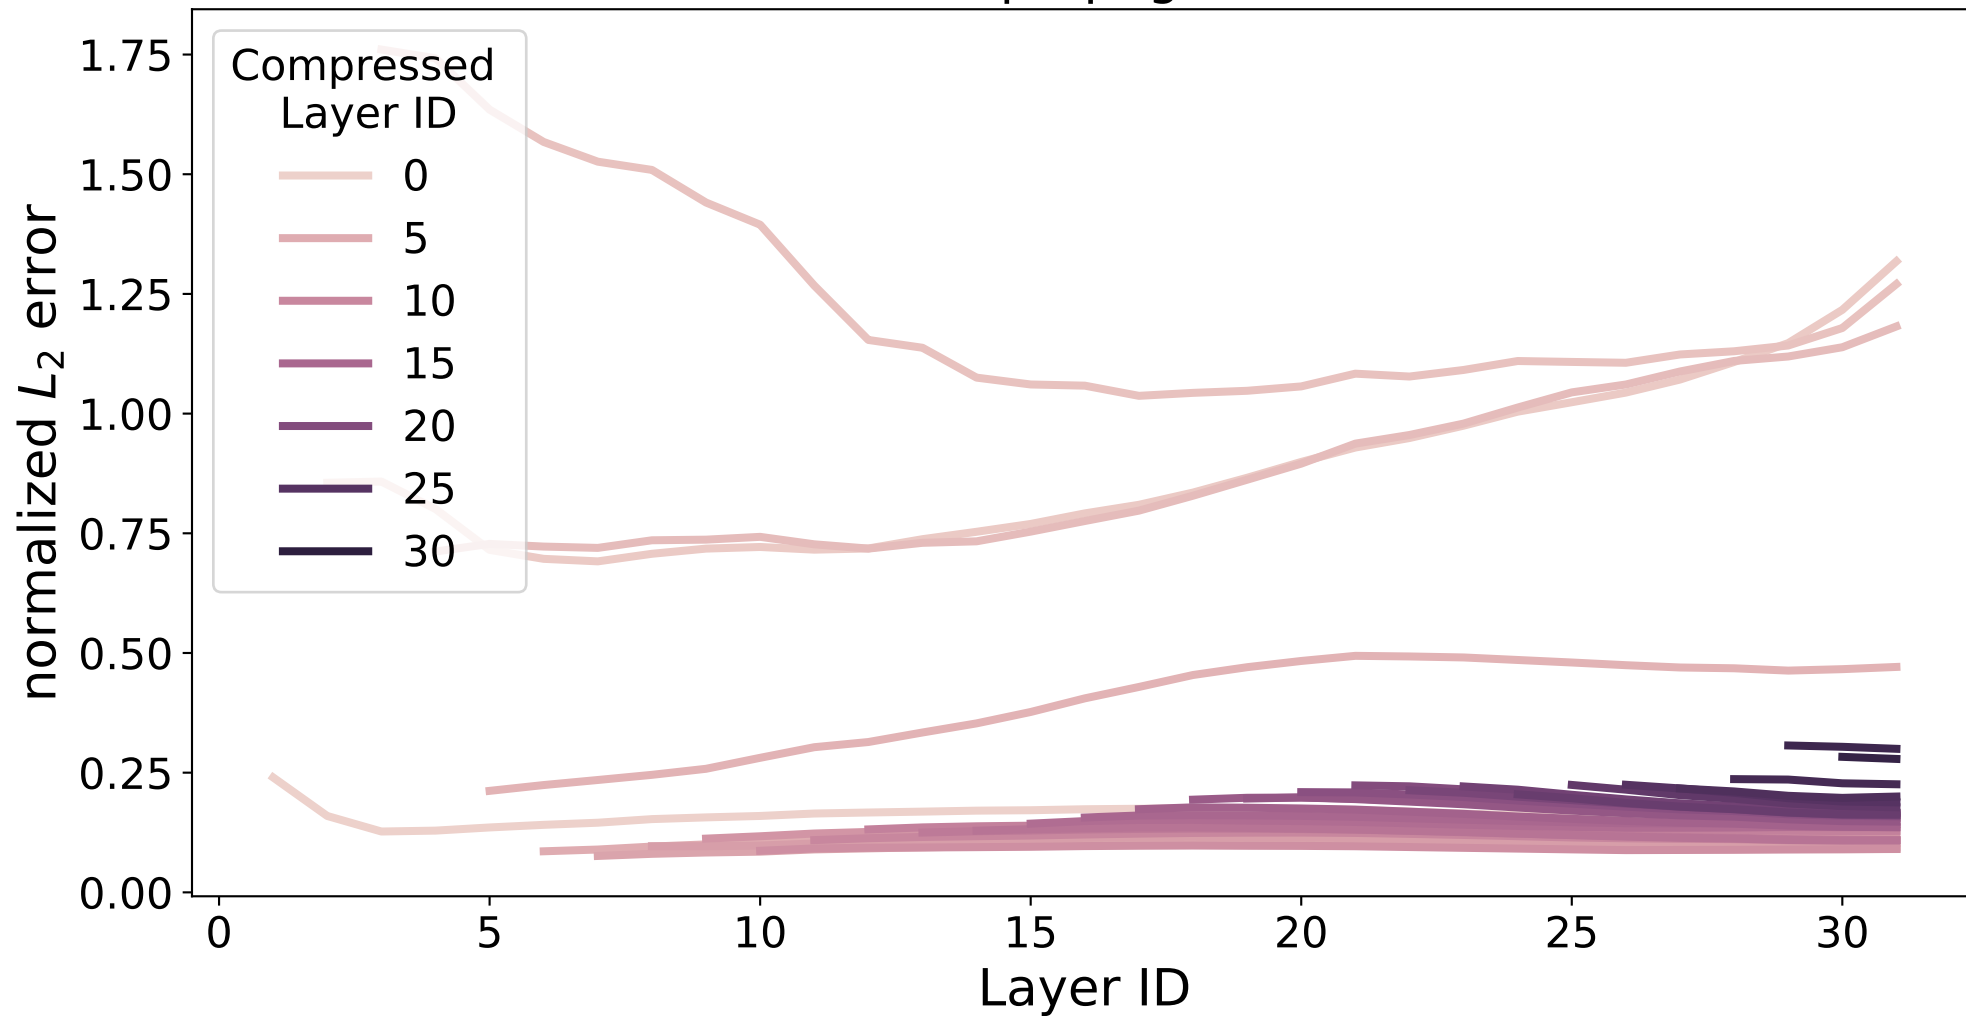

Supplement: supplementary_material [file propagation.pdf › MXSens/experiments/weights-extraction/propagation.pdf]
